# Supplementary material
Source: PubMed Central journal article supplement (PMC3258885)

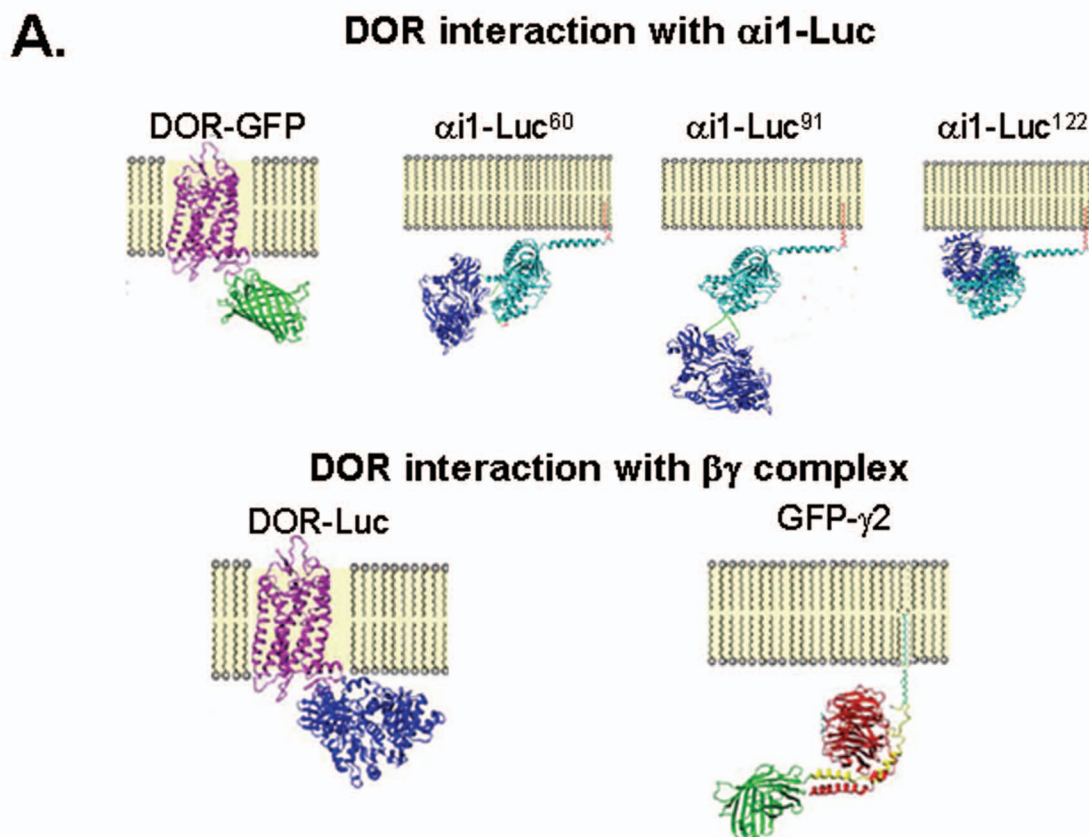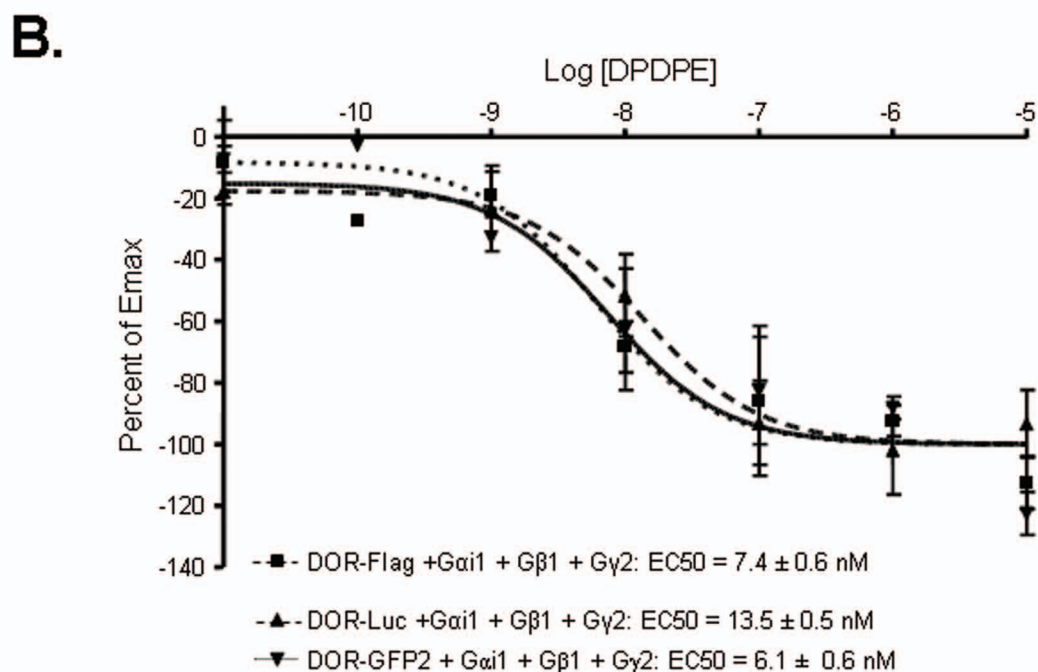

**Supplementary Figure 1**

Supplement: M707941200_1.pdf [file M707941200_1.pdf]
